# Supplementary material for: Head impulse compensatory saccades: Visual dependence is most evident in bilateral vestibular loss
Source: PLoS One. 2020 Jan 15;15(1):e0227406. doi: 10.1371/journal.pone.0227406 (PMC6961882; doi:10.1371/journal.pone.0227406)
Supplement: S1 Table — The table follows tidy data principles, with each column a variable and each row an observation. Each numeric variable shows the mean±SD. SacNumber refers to the first and second saccade after the head impulse onset. SCC indicates the semicircular canal. NaN values indicate insufficient data to determine a value. (CSV) [file pone.0227406.s001.csv]

SubjectID	AgeDecade	CaseGroup	ConditionOrder	SCC	Condition	VORGain	SacNumber	SacAmp(deg)	SacLatency(ms)	SacFreq(percent)
Subject08	50	Normal	light-dark	Lateral	Light	0.98±0.039	1	0.5±0.21	353±65.8	69±1.3
Subject08	50	Normal	light-dark	Lateral	Light	0.98±0.039	2	0.5±0.02	340±0.7	17±14.6
Subject08	50	Normal	light-dark	Lateral	Dark	0.97±0.063	1	1.5±0.61	335±71.6	80±2.4
Subject08	50	Normal	light-dark	Lateral	Dark	0.97±0.063	2	1.5±0.59	374±84.4	52±7.4
Subject08	50	Normal	light-dark	Anterior	Light	0.93±0.086	1	0.5±0.24	421±86.1	35±9.1
Subject08	50	Normal	light-dark	Anterior	Light	0.93±0.086	2	0.3±NaN	550±NaN	5±NaN
Subject08	50	Normal	light-dark	Anterior	Dark	0.82±0.114	1	1.1±0.45	372±102.5	19±4.6
Subject08	50	Normal	light-dark	Anterior	Dark	0.82±0.114	2	0.4±NaN	517±NaN	6±NaN
Subject08	50	Normal	light-dark	Posterior	Light	0.83±0.058	1	0.8±0.17	408±92.0	25±2.3
Subject08	50	Normal	light-dark	Posterior	Dark	0.78±0.118	1	1.2±0.55	325±49.2	20±0.0
Subject08	50	Normal	light-dark	Posterior	Dark	0.78±0.118	2	1.6±NaN	478±NaN	4±NaN
Subject09	20	Normal	dark-light	Lateral	Light	0.97±0.049	1	0.3±0.29	335±104.5	44±16.5
Subject09	20	Normal	dark-light	Lateral	Dark	1.02±0.050	1	1.3±0.78	461±44.7	25±3.9
Subject11	50	UVDc	light-dark	Lateral	Light	0.91±0.025	1	0.6±0.32	330±128.6	87±0.0
Subject11	50	UVDc	light-dark	Lateral	Light	0.91±0.025	2	0.5±0.01	482±17.4	19±0.0
Subject11	50	UVDc	light-dark	Lateral	Dark	1.01±0.033	1	0.8±NaN	495±NaN	41±NaN
Subject11	50	UVDc	light-dark	Anterior	Light	0.95±0.047	1	0.4±0.41	376±61.7	74±0.0
Subject11	50	UVDc	light-dark	Anterior	Light	0.95±0.047	2	0.5±0.22	491±29.7	13±0.0
Subject11	50	UVDc	light-dark	Anterior	Dark	0.84±0.057	1	0.4±0.01	438±70.0	31±0.0
Subject11	50	UVDc	light-dark	Posterior	Light	0.76±0.092	1	1.4±1.13	201±85.1	97±0.0
Subject11	50	UVDc	light-dark	Posterior	Light	0.76±0.092	2	0.3±0.10	451±63.3	48±0.0
Subject11	50	UVDc	light-dark	Posterior	Dark	0.87±0.091	1	1.2±0.60	374±108.5	62±0.0
Subject11	50	UVDi	light-dark	Lateral	Light	0.51±0.076	1	6.8±2.88	138±19.1	96±0.0
Subject11	50	UVDi	light-dark	Lateral	Light	0.51±0.076	2	2.3±1.50	292±61.2	93±0.0
Subject11	50	UVDi	light-dark	Lateral	Dark	0.50±0.074	1	5.3±2.50	125±29.7	97±0.0
Subject11	50	UVDi	light-dark	Lateral	Dark	0.50±0.074	2	2.7±1.12	348±101.9	94±0.0
Subject11	50	UVDi	light-dark	Anterior	Light	0.44±0.064	1	2.5±0.83	138±11.8	100±0.0
Subject11	50	UVDi	light-dark	Anterior	Light	0.44±0.064	2	1.4±0.59	276±55.8	76±0.0
Subject11	50	UVDi	light-dark	Anterior	Dark	0.51±0.068	1	2.0±0.67	225±103.8	89±0.0
Subject11	50	UVDi	light-dark	Anterior	Dark	0.51±0.068	2	1.7±0.51	385±51.5	29±0.0
Subject11	50	UVDi	light-dark	Posterior	Light	0.40±0.068	1	3.8±1.12	138±15.9	100±0.0
Subject11	50	UVDi	light-dark	Posterior	Light	0.40±0.068	2	1.9±0.81	281±39.6	92±0.0
Subject11	50	UVDi	light-dark	Posterior	Dark	0.21±0.070	1	4.9±1.89	169±90.3	94±0.0
Subject11	50	UVDi	light-dark	Posterior	Dark	0.21±0.070	2	3.3±1.59	359±111.9	77±0.0
Subject25	30	Normal	dark-light	Lateral	Light	1.03±0.038	1	0.6±0.42	270±72.6	85±0.0
Subject25	30	Normal	dark-light	Lateral	Light	1.03±0.038	2	0.3±0.09	428±76.2	28±5.2
Subject25	30	Normal	dark-light	Lateral	Dark	1.05±0.050	1	0.8±0.38	387±67.9	58±1.6
Subject25	30	Normal	dark-light	Anterior	Light	0.93±0.063	1	0.5±0.26	294±50.5	39±6.9
Subject25	30	Normal	dark-light	Anterior	Light	0.93±0.063	2	0.4±NaN	412±NaN	7±NaN
Subject25	30	Normal	dark-light	Anterior	Dark	0.92±0.107	1	0.6±0.20	352±48.3	16±6.7
Subject25	30	Normal	dark-light	Posterior	Light	0.86±0.057	1	0.6±0.48	284±32.8	62±13.7
Subject25	30	Normal	dark-light	Posterior	Dark	0.87±0.077	1	1.0±0.60	342±168.5	12±0.4
Subject49	70	BVL	dark-light	Lateral	Light	0.03±0.046	1	5.5±2.02	202±61.3	90±5.9
Subject49	70	BVL	dark-light	Lateral	Light	0.03±0.046	2	4.3±2.22	359±89.1	84±12.0
Subject49	70	BVL	dark-light	Lateral	Dark	0.03±0.043	1	1.8±1.13	451±127.5	31±4.1
Subject33	50	UVDc	light-dark	Lateral	Light	0.91±0.054	1	0.7±0.26	318±109.3	98±0.0
Subject33	50	UVDc	light-dark	Lateral	Light	0.91±0.054	2	1.0±0.47	510±45.2	47±0.0
Subject33	50	UVDc	light-dark	Lateral	Dark	0.98±0.038	1	3.8±2.80	259±170.7	91±0.0
Subject33	50	UVDc	light-dark	Lateral	Dark	0.98±0.038	2	1.6±0.43	516±15.1	57±0.0
Subject33	50	UVDc	light-dark	Anterior	Light	0.92±0.102	NA	NA	NA	NA
Subject33	50	UVDc	light-dark	Anterior	Dark	0.58±0.095	NA	NA	NA	NA
Subject33	50	UVDc	light-dark	Posterior	Light	0.72±0.041	1	1.5±NaN	182±NaN	32±NaN
Subject33	50	UVDc	light-dark	Posterior	Dark	0.66±0.083	1	0.9±0.25	306±59.0	19±0.0
Subject33	50	UVDi	light-dark	Lateral	Light	0.28±0.086	1	4.1±2.19	152±40.1	94±0.0
Subject33	50	UVDi	light-dark	Lateral	Light	0.28±0.086	2	4.0±1.37	309±114.6	83±0.0
Subject33	50	UVDi	light-dark	Lateral	Dark	0.25±0.053	1	5.3±2.43	134±22.7	71±0.0
Subject33	50	UVDi	light-dark	Lateral	Dark	0.25±0.053	2	5.5±3.41	280±85.5	93±0.0
Subject33	50	UVDi	light-dark	Anterior	Light	0.41±0.072	1	1.7±1.44	256±102.9	100±0.0
Subject33	50	UVDi	light-dark	Anterior	Light	0.41±0.072	2	2.8±1.66	448±60.3	50±0.0
Subject33	50	UVDi	light-dark	Anterior	Dark	0.36±0.119	1	1.8±0.89	419±94.9	25±0.0
Subject33	50	UVDi	light-dark	Posterior	Light	0.42±0.058	1	3.0±1.27	225±85.6	100±0.0
Subject33	50	UVDi	light-dark	Posterior	Light	0.42±0.058	2	2.3±1.83	459±63.5	71±0.0
Subject33	50	UVDi	light-dark	Posterior	Dark	0.28±0.070	1	2.5±1.79	315±110.1	70±0.0
Subject33	50	UVDi	light-dark	Posterior	Dark	0.28±0.070	2	3.2±2.21	440±65.4	20±0.0
Subject39	20	Normal	light-dark	Lateral	Light	0.92±0.053	1	0.7±0.42	230±77.7	44±7.5
Subject39	20	Normal	light-dark	Lateral	Light	0.92±0.053	2	0.6±0.77	313±61.8	7±0.8
Subject39	20	Normal	light-dark	Lateral	Dark	0.94±0.059	1	0.7±0.44	441±111.9	26±0.9
Subject39	20	Normal	light-dark	Lateral	Dark	0.94±0.059	2	0.3±0.37	413±142.9	3±1.0
Subject32	40	Normal	light-dark	Lateral	Light	0.91±0.044	1	0.4±0.22	344±79.9	63±4.4
Subject32	40	Normal	light-dark	Lateral	Light	0.91±0.044	2	0.6±NaN	509±NaN	6±NaN
Subject32	40	Normal	light-dark	Lateral	Dark	0.97±0.085	1	2.4±0.41	403±174.9	15±2.8
Subject32	40	Normal	light-dark	Anterior	Light	0.91±0.154	1	0.9±0.56	369±65.3	49±11.1
Subject32	40	Normal	light-dark	Anterior	Light	0.91±0.154	2	0.4±NaN	412±NaN	5±NaN
Subject32	40	Normal	light-dark	Anterior	Dark	0.81±0.150	1	1.3±0.45	489±68.8	8±3.5
Subject32	40	Normal	light-dark	Posterior	Light	0.79±0.078	1	1.3±0.66	271±96.2	75±27.3
Subject32	40	Normal	light-dark	Posterior	Light	0.79±0.078	2	0.7±0.36	473±61.0	35±0.0
Subject32	40	Normal	light-dark	Posterior	Dark	0.76±0.130	NA	NA	NA	NA
Subject42	30	BVL	light-dark	Lateral	Light	0.19±0.044	1	6.7±2.77	171±42.8	96±3.8
Subject42	30	BVL	light-dark	Lateral	Light	0.19±0.044	2	2.3±1.33	336±78.2	92±2.0
Subject42	30	BVL	light-dark	Lateral	Dark	0.24±0.060	1	4.1±1.69	249±71.6	97±0.0
Subject42	30	BVL	light-dark	Lateral	Dark	0.24±0.060	2	3.3±1.53	382±105.9	44±9.1
Subject42	30	BVL	light-dark	Anterior	Light	0.44±0.117	1	4.1±1.83	139±33.1	97±0.2
Subject42	30	BVL	light-dark	Anterior	Light	0.44±0.117	2	1.2±0.77	354±91.1	79±5.8
Subject42	30	BVL	light-dark	Anterior	Dark	0.44±0.130	2	1.0±0.19	504±58.6	32±8.4
Subject42	30	BVL	light-dark	Posterior	Light	0.13±0.051	1	6.0±1.52	119±23.5	100±0.0
Subject42	30	BVL	light-dark	Posterior	Light	0.13±0.051	2	2.0±1.17	329±48.8	87±2.7
Subject42	30	BVL	light-dark	Posterior	Dark	0.14±0.052	1	2.2±1.68	236±135.9	52±13.6
Subject42	30	BVL	light-dark	Posterior	Dark	0.14±0.052	2	1.5±0.80	356±113.1	19±8.4
Subject13	40	UVDc	light-dark	Lateral	Light	0.83±0.050	1	1.0±0.48	248±72.4	91±0.0
Subject13	40	UVDc	light-dark	Lateral	Light	0.83±0.050	2	0.5±0.27	427±80.2	65±0.0
Subject13	40	UVDc	light-dark	Lateral	Dark	0.93±0.055	1	2.4±1.40	411±149.4	87±0.0
Subject13	40	UVDc	light-dark	Lateral	Dark	0.93±0.055	2	2.1±1.64	539±30.8	35±0.0
Subject13	40	UVDc	light-dark	Anterior	Light	0.82±0.062	1	0.5±0.19	390±43.9	58±0.0
Subject13	40	UVDc	light-dark	Anterior	Dark	0.60±0.077	1	0.9±0.31	407±97.1	29±0.0
Subject13	40	UVDc	light-dark	Anterior	Dark	0.60±0.077	2	0.7±0.06	531±23.5	8±0.0
Subject13	40	UVDc	light-dark	Posterior	Light	0.72±0.053	1	1.7±0.89	292±106.4	87±0.0
Subject13	40	UVDc	light-dark	Posterior	Dark	0.80±0.085	NA	NA	NA	NA
Subject13	40	UVDi	light-dark	Lateral	Light	0.40±0.048	1	5.2±1.47	123±28.7	94±0.0
Subject13	40	UVDi	light-dark	Lateral	Light	0.40±0.048	2	3.7±1.41	266±62.9	100±0.0
Subject13	40	UVDi	light-dark	Lateral	Dark	0.34±0.053	1	10.6±5.55	112±26.6	94±0.0
Subject13	40	UVDi	light-dark	Lateral	Dark	0.34±0.053	2	6.7±4.07	243±97.8	55±0.0
Subject13	40	UVDi	light-dark	Anterior	Light	0.57±0.057	1	1.8±0.94	199±52.9	100±0.0
Subject13	40	UVDi	light-dark	Anterior	Light	0.57±0.057	2	1.2±0.51	323±79.4	67±0.0
Subject13	40	UVDi	light-dark	Anterior	Dark	0.41±0.071	1	2.3±1.54	282±127.3	50±0.0
Subject13	40	UVDi	light-dark	Anterior	Dark	0.41±0.071	2	0.3±NaN	586±NaN	7±NaN
Subject13	40	UVDi	light-dark	Posterior	Light	0.45±0.067	1	3.8±1.81	174±33.9	100±0.0
Subject13	40	UVDi	light-dark	Posterior	Light	0.45±0.067	2	0.8±0.52	456±69.6	93±0.0
Subject13	40	UVDi	light-dark	Posterior	Dark	0.30±0.061	1	3.2±1.55	191±63.4	88±0.0
Subject13	40	UVDi	light-dark	Posterior	Dark	0.30±0.061	2	1.2±0.56	342±77.2	36±0.0
Subject46	70	UVDc	light-dark	Lateral	Light	0.69±0.075	1	2.4±1.14	180±20.3	95±0.0
Subject46	70	UVDc	light-dark	Lateral	Light	0.69±0.075	2	0.9±0.56	365±101.9	58±0.0
Subject46	70	UVDc	light-dark	Lateral	Dark	0.68±0.055	1	1.1±0.29	367±50.8	39±0.0
Subject46	70	UVDc	light-dark	Anterior	Light	0.67±0.061	1	0.8±0.74	372±98.3	64±0.0
Subject46	70	UVDc	light-dark	Anterior	Light	0.67±0.061	2	0.5±0.25	456±80.3	8±0.0
Subject46	70	UVDc	light-dark	Anterior	Dark	0.61±0.094	NA	NA	NA	NA
Subject46	70	UVDc	light-dark	Posterior	Light	0.61±0.058	1	2.5±1.51	198±74.3	94±0.0
Subject46	70	UVDc	light-dark	Posterior	Light	0.61±0.058	2	0.7±0.44	396±80.4	48±0.0
Subject46	70	UVDc	light-dark	Posterior	Dark	0.54±0.082	1	3.6±1.35	175±80.5	73±0.0
Subject46	70	UVDc	light-dark	Posterior	Dark	0.54±0.082	2	0.6±0.11	387±45.6	15±0.0
Subject46	70	UVDi	light-dark	Lateral	Light	0.39±0.064	1	7.3±2.58	169±39.6	100±0.0
Subject46	70	UVDi	light-dark	Lateral	Light	0.39±0.064	2	2.7±1.06	331±52.7	88±0.0
Subject46	70	UVDi	light-dark	Lateral	Dark	0.24±0.049	1	5.1±1.89	165±100.8	89±0.0
Subject46	70	UVDi	light-dark	Lateral	Dark	0.24±0.049	2	5.3±6.14	336±100.6	19±0.0
Subject46	70	UVDi	light-dark	Anterior	Light	0.70±0.097	1	1.5±0.94	280±100.6	33±0.0
Subject46	70	UVDi	light-dark	Anterior	Light	0.70±0.097	2	1.1±0.64	442±43.7	12±0.0
Subject46	70	UVDi	light-dark	Anterior	Dark	0.59±0.093	1	0.8±NaN	455±NaN	27±NaN
Subject46	70	UVDi	light-dark	Posterior	Light	0.35±0.050	1	4.0±1.76	178±40.8	100±0.0
Subject46	70	UVDi	light-dark	Posterior	Light	0.35±0.050	2	2.0±1.65	353±85.2	80±0.0
Subject46	70	UVDi	light-dark	Posterior	Dark	0.26±0.052	1	1.4±0.26	307±78.5	10±0.0
Subject03	60	BVL	light-dark	Lateral	Light	0.22±0.042	1	6.2±2.56	252±137.2	87±14.4
Subject03	60	BVL	light-dark	Lateral	Light	0.22±0.042	2	4.6±2.34	355±115.6	52±15.0
Subject03	60	BVL	light-dark	Lateral	Dark	0.18±0.035	1	0.7±0.23	467±57.7	55±11.0
Subject03	60	BVL	light-dark	Lateral	Dark	0.18±0.035	2	1.3±NaN	566±NaN	4±NaN
Subject03	60	BVL	light-dark	Anterior	Light	0.43±0.092	1	2.1±1.80	328±149.7	33±7.3
Subject03	60	BVL	light-dark	Anterior	Dark	0.28±0.114	NA	NA	NA	NA
Subject03	60	BVL	light-dark	Posterior	Light	0.19±0.091	1	3.3±1.07	356±48.6	26±7.8
Subject03	60	BVL	light-dark	Posterior	Dark	0.15±0.062	1	1.2±0.40	417±4.5	9±0.0
Subject48	40	UVDc	light-dark	Lateral	Light	0.70±0.050	1	1.1±0.55	260±136.5	88±0.0
Subject48	40	UVDc	light-dark	Lateral	Light	0.70±0.050	2	0.9±0.72	398±150.0	58±0.0
Subject48	40	UVDc	light-dark	Lateral	Dark	0.83±0.078	1	2.4±0.78	273±255.3	83±0.0
Subject48	40	UVDc	light-dark	Lateral	Dark	0.83±0.078	2	1.7±1.16	442±91.0	83±0.0
Subject48	40	UVDc	light-dark	Anterior	Light	0.85±0.078	NA	NA	NA	NA
Subject48	40	UVDc	light-dark	Anterior	Dark	0.89±0.107	NA	NA	NA	NA
Subject48	40	UVDc	light-dark	Posterior	Light	0.82±0.103	1	2.7±1.34	183±94.6	78±0.0
Subject48	40	UVDc	light-dark	Posterior	Dark	0.79±0.065	NA	NA	NA	NA
Subject48	40	UVDi	light-dark	Lateral	Light	0.29±0.068	1	7.8±2.44	130±16.1	100±0.0
Subject48	40	UVDi	light-dark	Lateral	Light	0.29±0.068	2	3.3±1.95	291±85.0	100±0.0
Subject48	40	UVDi	light-dark	Lateral	Dark	0.22±0.073	1	8.4±3.12	114±45.0	93±0.0
Subject48	40	UVDi	light-dark	Lateral	Dark	0.22±0.073	2	4.3±1.83	305±101.4	75±0.0
Subject48	40	UVDi	light-dark	Anterior	Light	0.62±0.081	1	1.4±0.81	328±119.5	79±0.0
Subject48	40	UVDi	light-dark	Anterior	Light	0.62±0.081	2	1.1±0.53	382±80.6	28±0.0
Subject48	40	UVDi	light-dark	Anterior	Dark	0.63±0.071	NA	NA	NA	NA
Subject48	40	UVDi	light-dark	Posterior	Light	0.38±0.108	1	3.3±1.83	154±23.4	100±0.0
Subject48	40	UVDi	light-dark	Posterior	Light	0.38±0.108	2	2.6±1.53	393±98.2	60±0.0
Subject48	40	UVDi	light-dark	Posterior	Dark	0.46±0.199	NA	NA	NA	NA
Subject20	60	Normal	light-dark	Lateral	Light	0.96±0.051	1	0.7±0.40	282±54.5	85±7.1
Subject20	60	Normal	light-dark	Lateral	Light	0.96±0.051	2	0.3±0.11	497±37.0	21±0.0
Subject20	60	Normal	light-dark	Lateral	Dark	0.98±0.054	1	1.3±0.59	366±92.3	68±5.5
Subject20	60	Normal	light-dark	Lateral	Dark	0.98±0.054	2	2.3±1.33	455±44.3	18±7.1
Subject20	60	Normal	light-dark	Anterior	Light	0.71±0.077	NA	NA	NA	NA
Subject20	60	Normal	light-dark	Posterior	Light	0.64±0.067	NA	NA	NA	NA
Subject17	60	UVDc	light-dark	Lateral	Light	0.74±0.030	1	1.7±0.56	157±29.5	100±0.0
Subject17	60	UVDc	light-dark	Lateral	Light	0.74±0.030	2	0.8±0.57	366±107.2	72±0.0
Subject17	60	UVDc	light-dark	Lateral	Dark	0.88±0.112	1	1.0±0.60	345±165.0	81±0.0
Subject17	60	UVDc	light-dark	Lateral	Dark	0.88±0.112	2	1.2±0.08	520±46.6	15±0.0
Subject17	60	UVDc	light-dark	Anterior	Light	0.82±0.126	1	0.8±NaN	400±NaN	36±NaN
Subject17	60	UVDc	light-dark	Anterior	Dark	0.81±0.103	1	1.0±NaN	501±NaN	6±NaN
Subject17	60	UVDc	light-dark	Posterior	Light	0.83±0.087	1	0.8±NaN	509±NaN	64±NaN
Subject17	60	UVDc	light-dark	Posterior	Dark	0.75±0.086	NA	NA	NA	NA
Subject17	60	UVDi	light-dark	Lateral	Light	0.49±0.054	1	4.3±1.55	245±128.0	89±0.0
Subject17	60	UVDi	light-dark	Lateral	Light	0.49±0.054	2	2.8±2.18	349±107.5	63±0.0
Subject17	60	UVDi	light-dark	Lateral	Dark	0.49±0.072	1	4.1±0.78	134±36.9	100±0.0
Subject17	60	UVDi	light-dark	Lateral	Dark	0.49±0.072	2	2.1±1.14	423±75.2	56±0.0
Subject17	60	UVDi	light-dark	Anterior	Light	0.39±0.081	1	1.4±0.60	144±32.8	100±0.0
Subject17	60	UVDi	light-dark	Anterior	Light	0.39±0.081	2	1.8±0.75	230±66.2	95±0.0
Subject17	60	UVDi	light-dark	Anterior	Dark	0.38±0.080	1	1.7±0.79	377±64.2	38±0.0
Subject17	60	UVDi	light-dark	Posterior	Light	0.24±0.059	1	6.1±2.57	201±82.0	81±0.0
Subject17	60	UVDi	light-dark	Posterior	Light	0.24±0.059	2	2.0±0.84	455±81.8	31±0.0
Subject17	60	UVDi	light-dark	Posterior	Dark	0.25±0.072	1	2.8±1.74	266±153.9	71±0.0
Subject17	60	UVDi	light-dark	Posterior	Dark	0.25±0.072	2	1.7±0.32	330±97.6	8±0.0
Subject02	60	UVDc	dark-light	Lateral	Light	0.88±0.026	1	1.3±0.84	261±90.8	100±0.0
Subject02	60	UVDc	dark-light	Lateral	Light	0.88±0.026	2	0.3±0.18	501±55.1	67±0.0
Subject02	60	UVDc	dark-light	Lateral	Dark	0.86±0.087	1	0.7±0.13	326±17.4	69±0.0
Subject02	60	UVDc	dark-light	Lateral	Dark	0.86±0.087	2	2.1±1.29	213±56.8	44±0.0
Subject02	60	UVDc	dark-light	Anterior	Light	0.83±0.038	1	0.8±0.43	324±52.4	75±0.0
Subject02	60	UVDc	dark-light	Anterior	Dark	0.77±0.068	NA	NA	NA	NA
Subject02	60	UVDc	dark-light	Posterior	Light	0.73±0.049	1	2.7±1.51	242±60.0	58±0.0
Subject02	60	UVDc	dark-light	Posterior	Light	0.73±0.049	2	0.8±NaN	562±NaN	19±NaN
Subject02	60	UVDc	dark-light	Posterior	Dark	0.67±0.046	1	1.0±1.00	330±136.6	71±0.0
Subject02	60	UVDc	dark-light	Posterior	Dark	0.67±0.046	2	0.7±0.40	405±54.3	24±0.0
Subject02	60	UVDi	dark-light	Lateral	Light	0.26±0.048	1	7.1±3.36	129±12.4	100±0.0
Subject02	60	UVDi	dark-light	Lateral	Light	0.26±0.048	2	3.2±1.42	212±49.1	100±0.0
Subject02	60	UVDi	dark-light	Lateral	Dark	0.27±0.085	1	4.4±3.24	146±40.3	98±0.0
Subject02	60	UVDi	dark-light	Lateral	Dark	0.27±0.085	2	2.0±1.47	347±111.8	83±0.0
Subject02	60	UVDi	dark-light	Anterior	Light	0.51±0.085	1	2.9±2.34	234±123.8	100±0.0
Subject02	60	UVDi	dark-light	Anterior	Light	0.51±0.085	2	1.4±0.89	350±97.3	59±0.0
Subject02	60	UVDi	dark-light	Anterior	Dark	0.48±0.079	1	1.1±0.46	382±99.9	67±0.0
Subject02	60	UVDi	dark-light	Anterior	Dark	0.48±0.079	2	0.8±NaN	522±NaN	6±NaN
Subject02	60	UVDi	dark-light	Posterior	Light	0.32±0.068	1	3.0±2.10	222±113.6	79±0.0
Subject02	60	UVDi	dark-light	Posterior	Light	0.32±0.068	2	0.9±0.41	415±34.4	45±0.0
Subject02	60	UVDi	dark-light	Posterior	Dark	0.31±0.060	1	1.4±0.87	306±83.5	76±0.0
Subject02	60	UVDi	dark-light	Posterior	Dark	0.31±0.060	2	2.5±1.57	484±43.2	24±0.0
Subject50	70	Normal	dark-light	Lateral	Light	0.97±0.056	1	0.9±0.68	273±85.0	83±3.7
Subject50	70	Normal	dark-light	Lateral	Light	0.97±0.056	2	0.7±0.26	474±84.0	40±1.8
Subject50	70	Normal	dark-light	Lateral	Dark	0.88±0.062	1	1.7±NaN	514±NaN	95±NaN
Subject50	70	Normal	dark-light	Lateral	Dark	0.88±0.062	2	1.1±0.45	368±77.9	59±3.6
Subject36	70	BVL	light-dark	Lateral	Light	0.23±0.043	1	5.4±1.93	205±48.0	93±8.6
Subject36	70	BVL	light-dark	Lateral	Light	0.23±0.043	2	2.6±2.30	386±79.4	83±3.4
Subject36	70	BVL	light-dark	Lateral	Dark	0.23±0.047	1	2.6±1.60	310±158.9	60±17.3
Subject36	70	BVL	light-dark	Lateral	Dark	0.23±0.047	2	1.7±0.42	503±73.4	8±2.6
Subject36	70	BVL	light-dark	Anterior	Light	0.40±0.094	1	1.6±1.27	190±54.5	100±0.0
Subject36	70	BVL	light-dark	Anterior	Light	0.40±0.094	2	0.9±0.66	364±95.9	56±1.2
Subject36	70	BVL	light-dark	Anterior	Dark	0.31±0.094	1	2.4±1.28	310±138.3	31±6.3
Subject36	70	BVL	light-dark	Posterior	Light	0.22±0.058	1	2.6±1.25	212±73.6	96±1.3
Subject36	70	BVL	light-dark	Posterior	Light	0.22±0.058	2	1.8±0.86	379±85.5	46±2.4
Subject36	70	BVL	light-dark	Posterior	Dark	0.18±0.071	1	2.0±1.32	279±148.5	27±4.2
Subject36	70	BVL	light-dark	Posterior	Dark	0.18±0.071	2	1.5±0.58	372±246.3	6±3.8
Subject05	40	UVDc	dark-light	Lateral	Light	1.03±0.051	1	1.2±0.77	265±63.8	90±0.0
Subject05	40	UVDc	dark-light	Lateral	Light	1.03±0.051	2	0.4±0.26	482±38.3	76±0.0
Subject05	40	UVDc	dark-light	Lateral	Dark	1.00±0.064	1	1.5±NaN	195±NaN	4±NaN
Subject05	40	UVDc	dark-light	Anterior	Light	0.92±0.051	1	0.7±0.40	375±74.7	44±0.0
Subject05	40	UVDc	dark-light	Anterior	Dark	0.83±0.075	NA	NA	NA	NA
Subject05	40	UVDc	dark-light	Posterior	Light	0.91±0.067	1	0.8±0.58	364±62.8	75±0.0
Subject05	40	UVDc	dark-light	Posterior	Light	0.91±0.067	2	0.6±NaN	504±NaN	5±NaN
Subject05	40	UVDc	dark-light	Posterior	Dark	0.87±0.078	NA	NA	NA	NA
Subject05	40	UVDi	dark-light	Lateral	Light	0.56±0.101	1	6.8±2.37	180±30.3	100±0.0
Subject05	40	UVDi	dark-light	Lateral	Light	0.56±0.101	2	1.8±1.12	353±52.8	100±0.0
Subject05	40	UVDi	dark-light	Lateral	Dark	0.53±0.074	1	1.5±0.71	452±120.2	28±0.0
Subject05	40	UVDi	dark-light	Anterior	Light	0.57±0.092	1	2.9±1.23	211±82.2	100±0.0
Subject05	40	UVDi	dark-light	Anterior	Light	0.57±0.092	2	1.7±1.38	367±45.6	72±0.0
Subject05	40	UVDi	dark-light	Anterior	Dark	0.76±0.094	1	1.7±1.46	261±116.4	10±0.0
Subject05	40	UVDi	dark-light	Posterior	Light	0.36±0.083	1	4.2±2.21	167±36.6	100±0.0
Subject05	40	UVDi	dark-light	Posterior	Light	0.36±0.083	2	2.9±1.96	334±61.5	81±0.0
Subject05	40	UVDi	dark-light	Posterior	Dark	0.37±0.081	1	4.4±3.43	333±130.3	43±0.0
Subject51	60	UVDc	dark-light	Lateral	Light	0.86±0.034	1	0.9±0.39	242±51.9	91±0.0
Subject51	60	UVDc	dark-light	Lateral	Light	0.86±0.034	2	0.7±0.53	383±154.8	62±0.0
Subject51	60	UVDc	dark-light	Lateral	Dark	0.90±0.049	1	1.4±0.21	410±23.2	52±0.0
Subject51	60	UVDc	dark-light	Anterior	Light	0.81±0.044	1	1.2±0.79	328±83.0	52±0.0
Subject51	60	UVDc	dark-light	Anterior	Light	0.81±0.044	2	0.5±0.21	487±0.1	16±0.0
Subject51	60	UVDc	dark-light	Anterior	Dark	0.67±0.054	1	1.2±0.68	429±90.3	43±0.0
Subject51	60	UVDc	dark-light	Posterior	Light	0.77±0.063	2	1.1±0.11	519±49.2	30±0.0
Subject51	60	UVDc	dark-light	Posterior	Dark	0.78±0.097	1	1.7±1.21	245±55.1	62±0.0
Subject51	60	UVDc	dark-light	Posterior	Dark	0.78±0.097	2	4.4±5.95	391±132.7	15±0.0
Subject51	60	UVDi	dark-light	Lateral	Light	0.49±0.067	1	4.6±1.71	144±36.3	100±0.0
Subject51	60	UVDi	dark-light	Lateral	Light	0.49±0.067	2	3.9±1.98	323±102.5	97±0.0
Subject51	60	UVDi	dark-light	Lateral	Dark	0.41±0.059	1	4.3±2.09	195±98.7	94±0.0
Subject51	60	UVDi	dark-light	Lateral	Dark	0.41±0.059	2	3.1±1.11	426±120.4	58±0.0
Subject51	60	UVDi	dark-light	Anterior	Light	0.58±0.083	1	1.3±1.24	457±85.1	50±0.0
Subject51	60	UVDi	dark-light	Anterior	Dark	0.60±0.060	1	1.9±1.29	224±67.4	100±0.0
Subject51	60	UVDi	dark-light	Anterior	Dark	0.60±0.060	2	1.8±1.60	403±75.2	69±0.0
Subject51	60	UVDi	dark-light	Posterior	Light	0.30±0.039	1	3.4±1.90	183±30.9	100±0.0
Subject51	60	UVDi	dark-light	Posterior	Light	0.30±0.039	2	3.3±2.04	427±104.6	73±0.0
Subject51	60	UVDi	dark-light	Posterior	Dark	0.22±0.035	1	2.9±1.77	360±99.5	52±0.0
Subject23	40	BVL	light-dark	Lateral	Light	0.14±0.043	1	10.8±2.73	139±10.6	83±12.1
Subject23	40	BVL	light-dark	Lateral	Light	0.14±0.043	2	5.1±4.58	287±100.6	93±3.5
Subject23	40	BVL	light-dark	Lateral	Dark	0.14±0.037	1	4.0±1.87	179±107.7	82±13.3
Subject23	40	BVL	light-dark	Lateral	Dark	0.14±0.037	2	1.3±0.32	441±46.8	18±0.0
Subject23	40	BVL	light-dark	Anterior	Light	0.20±0.093	1	3.0±1.37	141±38.4	100±0.0
Subject23	40	BVL	light-dark	Anterior	Light	0.20±0.093	2	1.8±0.78	258±58.7	95±1.5
Subject23	40	BVL	light-dark	Anterior	Dark	0.24±0.114	1	1.2±0.50	355±94.4	52±2.7
Subject23	40	BVL	light-dark	Anterior	Dark	0.24±0.114	2	0.9±0.56	413±70.3	9±3.5
Subject23	40	BVL	light-dark	Posterior	Light	0.21±0.045	1	6.5±2.29	161±29.0	100±0.0
Subject23	40	BVL	light-dark	Posterior	Light	0.21±0.045	2	1.1±1.06	404±43.7	81±14.9
Subject23	40	BVL	light-dark	Posterior	Dark	0.20±0.051	1	1.6±1.19	204±128.1	53±1.5
Subject23	40	BVL	light-dark	Posterior	Dark	0.20±0.051	2	0.5±0.22	408±80.7	15±4.0
Subject12	20	Normal	light-dark	Lateral	Light	0.94±0.032	1	0.3±0.29	347±102.7	61±7.3
Subject12	20	Normal	light-dark	Lateral	Light	0.94±0.032	2	0.2±0.12	486±57.6	14±3.1
Subject12	20	Normal	light-dark	Lateral	Dark	0.87±0.027	1	0.9±0.40	384±157.1	30±7.2
Subject12	20	Normal	light-dark	Lateral	Dark	0.87±0.027	2	1.2±NaN	270±NaN	2±NaN
Subject12	20	Normal	light-dark	Anterior	Light	0.87±0.051	1	0.6±0.08	281±42.9	19±6.7
Subject12	20	Normal	light-dark	Posterior	Light	0.84±0.081	2	4.8±5.43	420±81.3	5±0.0
Subject21	60	UVDc	dark-light	Lateral	Light	1.01±0.062	1	1.7±0.80	336±88.1	91±0.0
Subject21	60	UVDc	dark-light	Lateral	Light	1.01±0.062	2	1.1±0.74	449±124.4	36±0.0
Subject21	60	UVDc	dark-light	Lateral	Dark	1.00±0.108	NA	NA	NA	NA
Subject21	60	UVDc	dark-light	Anterior	Light	0.88±0.104	1	0.4±NaN	417±NaN	44±NaN
Subject21	60	UVDc	dark-light	Anterior	Dark	0.88±0.097	1	1.8±NaN	479±NaN	62±NaN
Subject21	60	UVDc	dark-light	Posterior	Light	0.67±0.038	1	0.6±0.18	534±85.6	54±0.0
Subject21	60	UVDc	dark-light	Posterior	Light	0.67±0.038	2	0.7±0.22	581±6.6	12±0.0
Subject21	60	UVDc	dark-light	Posterior	Dark	0.61±0.057	1	4.3±NaN	570±NaN	26±NaN
Subject21	60	UVDi	dark-light	Lateral	Light	0.43±0.078	1	6.2±1.69	138±19.9	100±0.0
Subject21	60	UVDi	dark-light	Lateral	Light	0.43±0.078	2	4.7±1.64	333±32.9	100±0.0
Subject21	60	UVDi	dark-light	Lateral	Dark	0.43±0.104	1	3.1±1.17	175±81.7	88±0.0
Subject21	60	UVDi	dark-light	Lateral	Dark	0.43±0.104	2	2.2±0.58	440±85.0	42±0.0
Subject21	60	UVDi	dark-light	Anterior	Light	0.29±0.061	1	5.3±2.47	280±37.7	88±0.0
Subject21	60	UVDi	dark-light	Anterior	Light	0.29±0.061	2	3.0±2.27	439±75.9	84±0.0
Subject21	60	UVDi	dark-light	Anterior	Dark	0.34±0.054	1	1.0±0.60	394±66.9	28±0.0
Subject21	60	UVDi	dark-light	Anterior	Dark	0.34±0.054	2	1.5±NaN	320±NaN	4±NaN
Subject21	60	UVDi	dark-light	Posterior	Light	0.40±0.064	1	4.8±1.40	254±60.4	83±0.0
Subject21	60	UVDi	dark-light	Posterior	Light	0.40±0.064	2	0.6±NaN	543±NaN	4±NaN
Subject21	60	UVDi	dark-light	Posterior	Dark	0.42±0.046	1	1.8±0.84	283±56.2	100±0.0
Subject21	60	UVDi	dark-light	Posterior	Dark	0.42±0.046	2	1.6±0.50	466±54.8	48±0.0
Subject52	30	UVDc	dark-light	Lateral	Light	0.89±0.042	1	0.6±0.34	311±79.4	78±0.0
Subject52	30	UVDc	dark-light	Lateral	Light	0.89±0.042	2	0.6±0.38	440±60.8	19±0.0
Subject52	30	UVDc	dark-light	Lateral	Dark	0.94±0.075	1	2.2±1.55	377±9.0	64±0.0
Subject52	30	UVDc	dark-light	Lateral	Dark	0.94±0.075	2	2.5±NaN	346±NaN	8±NaN
Subject52	30	UVDc	dark-light	Anterior	Light	0.79±0.048	1	0.5±0.26	423±79.2	39±0.0
Subject52	30	UVDc	dark-light	Anterior	Light	0.79±0.048	2	0.8±NaN	460±NaN	4±NaN
Subject52	30	UVDc	dark-light	Anterior	Dark	0.65±0.068	1	0.8±NaN	435±NaN	6±NaN
Subject52	30	UVDc	dark-light	Posterior	Light	0.71±0.064	1	1.1±0.46	333±89.9	51±0.0
Subject52	30	UVDc	dark-light	Posterior	Dark	0.80±0.062	1	0.8±NaN	571±NaN	33±NaN
Subject52	30	UVDi	dark-light	Lateral	Light	0.23±0.062	1	8.3±1.60	95±6.6	100±0.0
Subject52	30	UVDi	dark-light	Lateral	Light	0.23±0.062	2	2.1±1.19	218±42.6	100±0.0
Subject52	30	UVDi	dark-light	Lateral	Dark	0.33±0.087	1	6.5±3.08	130±59.3	98±0.0
Subject52	30	UVDi	dark-light	Lateral	Dark	0.33±0.087	2	3.4±2.07	266±47.4	63±0.0
Subject52	30	UVDi	dark-light	Anterior	Light	0.62±0.106	1	2.8±1.56	186±76.8	91±0.0
Subject52	30	UVDi	dark-light	Anterior	Light	0.62±0.106	2	1.2±0.53	338±79.0	50±0.0
Subject52	30	UVDi	dark-light	Anterior	Dark	0.61±0.071	1	2.8±1.99	339±81.4	72±0.0
Subject52	30	UVDi	dark-light	Posterior	Light	0.31±0.067	1	3.0±0.95	148±60.8	100±0.0
Subject52	30	UVDi	dark-light	Posterior	Light	0.31±0.067	2	3.4±1.81	330±58.7	97±0.0
Subject52	30	UVDi	dark-light	Posterior	Dark	0.26±0.060	1	1.9±0.64	283±146.9	42±0.0
Subject52	30	UVDi	dark-light	Posterior	Dark	0.26±0.060	2	1.9±NaN	383±NaN	5±NaN
Subject26	50	BVL	light-dark	Lateral	Light	0.18±0.038	1	7.6±2.02	139±18.6	97±2.5
Subject26	50	BVL	light-dark	Lateral	Light	0.18±0.038	2	2.9±0.98	342±68.0	84±6.8
Subject26	50	BVL	light-dark	Lateral	Dark	0.16±0.039	1	4.4±1.64	128±44.9	93±3.2
Subject26	50	BVL	light-dark	Lateral	Dark	0.16±0.039	2	1.7±1.31	361±75.3	24±1.3
Subject26	50	BVL	light-dark	Anterior	Light	0.48±0.153	1	1.1±0.69	384±182.2	18±0.0
Subject26	50	BVL	light-dark	Anterior	Dark	0.42±0.137	NA	NA	NA	NA
Subject26	50	BVL	light-dark	Posterior	Light	0.32±0.156	1	3.1±1.85	341±152.0	83±6.5
Subject26	50	BVL	light-dark	Posterior	Light	0.32±0.156	2	2.7±1.49	491±24.9	18±0.0
Subject26	50	BVL	light-dark	Posterior	Dark	0.22±0.117	1	2.3±1.37	171±124.0	81±1.3
Subject26	50	BVL	light-dark	Posterior	Dark	0.22±0.117	2	2.5±2.51	405±95.9	18±6.7
Subject22	40	UVDc	dark-light	Lateral	Light	0.80±0.069	1	1.0±0.80	265±91.6	95±0.0
Subject22	40	UVDc	dark-light	Lateral	Light	0.80±0.069	2	0.4±0.16	421±56.5	38±0.0
Subject22	40	UVDc	dark-light	Lateral	Dark	0.94±0.063	1	1.7±0.80	319±49.8	74±0.0
Subject22	40	UVDc	dark-light	Lateral	Dark	0.94±0.063	2	1.5±0.58	332±51.7	30±0.0
Subject22	40	UVDc	dark-light	Anterior	Light	0.87±0.348	1	1.2±NaN	421±NaN	8±NaN
Subject22	40	UVDc	dark-light	Anterior	Dark	1.06±0.096	1	0.7±0.51	346±125.7	23±0.0
Subject22	40	UVDc	dark-light	Anterior	Dark	1.06±0.096	2	0.4±0.19	502±37.2	6±0.0
Subject22	40	UVDc	dark-light	Posterior	Light	0.54±0.109	1	1.5±NaN	270±NaN	3±NaN
Subject22	40	UVDc	dark-light	Posterior	Dark	0.69±0.128	1	0.9±0.58	462±29.2	16±0.0
Subject22	40	UVDi	dark-light	Lateral	Light	0.36±0.112	1	4.8±2.35	184±90.6	98±0.0
Subject22	40	UVDi	dark-light	Lateral	Light	0.36±0.112	2	4.4±2.64	314±99.9	72±0.0
Subject22	40	UVDi	dark-light	Lateral	Dark	0.22±0.115	1	5.0±3.30	179±127.3	90±0.0
Subject22	40	UVDi	dark-light	Lateral	Dark	0.22±0.115	2	2.7±1.28	364±82.7	65±0.0
Subject22	40	UVDi	dark-light	Anterior	Light	0.27±0.180	1	2.9±0.98	174±171.5	27±0.0
Subject22	40	UVDi	dark-light	Anterior	Dark	0.47±0.172	1	1.8±1.72	217±141.2	44±0.0
Subject22	40	UVDi	dark-light	Anterior	Dark	0.47±0.172	2	1.4±1.14	310±171.9	18±0.0
Subject22	40	UVDi	dark-light	Posterior	Light	0.11±0.164	1	0.9±0.37	263±99.5	7±0.0
Subject22	40	UVDi	dark-light	Posterior	Light	0.11±0.164	2	1.6±NaN	462±NaN	2±NaN
Subject22	40	UVDi	dark-light	Posterior	Dark	0.40±0.208	1	1.7±0.64	265±154.4	28±0.0
Subject22	40	UVDi	dark-light	Posterior	Dark	0.40±0.208	2	1.7±1.50	344±140.6	24±0.0
Subject28	20	Normal	light-dark	Lateral	Light	0.96±0.080	1	0.6±0.31	305±42.6	21±2.8
Subject28	20	Normal	light-dark	Lateral	Dark	1.02±0.087	1	2.3±0.43	381±144.0	39±10.7
Subject28	20	Normal	light-dark	Lateral	Dark	1.02±0.087	2	2.6±1.18	333±77.4	14±6.5
Subject31	50	UVDc	light-dark	Lateral	Light	0.92±0.059	1	0.6±0.29	437±140.8	75±0.0
Subject31	50	UVDc	light-dark	Lateral	Light	0.92±0.059	2	0.5±0.10	506±46.8	25±0.0
Subject31	50	UVDc	light-dark	Lateral	Dark	1.00±0.075	1	0.8±NaN	541±NaN	42±NaN
Subject31	50	UVDc	light-dark	Lateral	Dark	1.00±0.075	2	1.7±NaN	403±NaN	4±NaN
Subject31	50	UVDc	light-dark	Anterior	Light	0.85±0.050	1	1.0±0.63	304±205.0	25±0.0
Subject31	50	UVDc	light-dark	Anterior	Dark	0.80±0.063	NA	NA	NA	NA
Subject31	50	UVDc	light-dark	Posterior	Light	0.76±0.060	1	1.1±0.29	355±133.9	41±0.0
Subject31	50	UVDc	light-dark	Posterior	Dark	0.71±0.080	1	1.1±0.34	482±50.0	17±0.0
Subject31	50	UVDi	light-dark	Lateral	Light	0.37±0.073	1	5.7±1.59	126±42.6	94±0.0
Subject31	50	UVDi	light-dark	Lateral	Light	0.37±0.073	2	2.6±1.08	191±26.8	100±0.0
Subject31	50	UVDi	light-dark	Lateral	Dark	0.38±0.061	1	4.9±2.16	148±91.1	97±0.0
Subject31	50	UVDi	light-dark	Lateral	Dark	0.38±0.061	2	2.0±0.79	338±109.3	66±0.0
Subject31	50	UVDi	light-dark	Anterior	Light	0.62±0.110	1	1.3±0.94	288±116.8	65±0.0
Subject31	50	UVDi	light-dark	Anterior	Light	0.62±0.110	2	0.8±NaN	459±NaN	8±NaN
Subject31	50	UVDi	light-dark	Anterior	Dark	0.46±0.096	1	1.9±1.42	281±97.4	52±0.0
Subject31	50	UVDi	light-dark	Anterior	Dark	0.46±0.096	2	1.6±0.96	406±64.7	22±0.0
Subject31	50	UVDi	light-dark	Posterior	Light	0.34±0.069	1	3.4±1.51	204±92.4	96±0.0
Subject31	50	UVDi	light-dark	Posterior	Light	0.34±0.069	2	1.4±0.66	384±87.3	68±0.0
Subject31	50	UVDi	light-dark	Posterior	Dark	0.32±0.047	1	1.5±0.62	331±135.2	33±0.0
Subject04	60	UVDc	dark-light	Lateral	Light	1.04±0.055	1	0.8±0.45	327±115.1	97±0.0
Subject04	60	UVDc	dark-light	Lateral	Light	1.04±0.055	2	0.4±0.23	522±28.5	48±0.0
Subject04	60	UVDc	dark-light	Lateral	Dark	1.22±0.121	1	1.4±0.83	332±45.5	71±0.0
Subject04	60	UVDc	dark-light	Lateral	Dark	1.22±0.121	2	2.1±0.80	416±95.4	43±0.0
Subject04	60	UVDc	dark-light	Anterior	Light	1.18±0.121	1	0.8±0.37	262±85.6	52±0.0
Subject04	60	UVDc	dark-light	Anterior	Dark	0.77±0.122	NA	NA	NA	NA
Subject04	60	UVDc	dark-light	Posterior	Light	0.90±0.070	1	2.5±1.46	212±69.6	88±0.0
Subject04	60	UVDc	dark-light	Posterior	Light	0.90±0.070	2	0.9±0.59	408±46.1	65±0.0
Subject04	60	UVDc	dark-light	Posterior	Dark	0.73±0.060	1	1.8±NaN	220±NaN	5±NaN
Subject04	60	UVDi	dark-light	Lateral	Light	0.27±0.069	1	4.7±2.58	173±30.1	97±0.0
Subject04	60	UVDi	dark-light	Lateral	Light	0.27±0.069	2	3.7±1.83	292±72.1	97±0.0
Subject04	60	UVDi	dark-light	Lateral	Dark	0.35±0.080	1	5.4±3.03	227±78.7	98±0.0
Subject04	60	UVDi	dark-light	Lateral	Dark	0.35±0.080	2	4.4±1.97	406±102.0	63±0.0
Subject04	60	UVDi	dark-light	Anterior	Light	0.48±0.093	1	5.1±3.96	200±70.7	96±0.0
Subject04	60	UVDi	dark-light	Anterior	Light	0.48±0.093	2	3.8±1.73	297±85.1	63±0.0
Subject04	60	UVDi	dark-light	Anterior	Dark	0.38±0.092	1	3.3±3.23	349±190.3	24±0.0
Subject04	60	UVDi	dark-light	Anterior	Dark	0.38±0.092	2	1.4±NaN	535±NaN	6±NaN
Subject04	60	UVDi	dark-light	Posterior	Light	0.46±0.044	1	5.8±2.58	196±29.1	100±0.0
Subject04	60	UVDi	dark-light	Posterior	Light	0.46±0.044	2	2.6±1.66	351±53.9	93±0.0
Subject04	60	UVDi	dark-light	Posterior	Dark	0.39±0.071	1	1.1±0.13	322±95.2	29±0.0
Subject04	60	UVDi	dark-light	Posterior	Dark	0.39±0.071	2	2.0±1.15	405±177.7	14±0.0
Subject47	60	UVDc	light-dark	Lateral	Light	0.70±0.057	1	0.5±0.34	396±22.5	79±0.0
Subject47	60	UVDc	light-dark	Lateral	Light	0.70±0.057	2	0.5±0.21	460±84.2	10±0.0
Subject47	60	UVDc	light-dark	Lateral	Dark	0.73±0.050	2	3.5±NaN	513±NaN	12±NaN
Subject47	60	UVDi	light-dark	Lateral	Light	0.30±0.098	1	7.5±2.48	181±60.1	97±0.0
Subject47	60	UVDi	light-dark	Lateral	Light	0.30±0.098	2	3.6±2.36	362±105.0	94±0.0
Subject47	60	UVDi	light-dark	Lateral	Dark	0.25±0.088	1	5.8±2.56	205±153.9	96±0.0
Subject47	60	UVDi	light-dark	Lateral	Dark	0.25±0.088	2	3.8±1.31	427±82.2	57±0.0
Subject35	50	Normal	dark-light	Lateral	Light	0.88±0.032	1	0.7±0.45	274±76.6	72±11.0
Subject35	50	Normal	dark-light	Lateral	Dark	0.92±0.042	1	0.8±0.59	445±91.8	36±5.2
Subject35	50	Normal	dark-light	Lateral	Dark	0.92±0.042	2	0.8±NaN	521±NaN	3±NaN
Subject40	40	UVDc	light-dark	Lateral	Light	0.80±0.043	1	0.3±0.21	285±77.5	88±0.0
Subject40	40	UVDc	light-dark	Lateral	Light	0.80±0.043	2	0.5±0.27	508±48.5	50±0.0
Subject40	40	UVDc	light-dark	Lateral	Dark	0.83±0.035	1	1.0±0.79	459±84.7	69±0.0
Subject40	40	UVDc	light-dark	Lateral	Dark	0.83±0.035	2	0.7±0.13	482±1.8	21±0.0
Subject40	40	UVDc	light-dark	Anterior	Light	0.74±0.037	1	0.4±NaN	388±NaN	30±NaN
Subject40	40	UVDc	light-dark	Anterior	Dark	0.64±0.051	NA	NA	NA	NA
Subject40	40	UVDc	light-dark	Posterior	Light	0.67±0.045	NA	NA	NA	NA
Subject40	40	UVDc	light-dark	Posterior	Dark	0.67±0.045	NA	NA	NA	NA
Subject40	40	UVDi	light-dark	Lateral	Light	0.40±0.078	1	4.5±1.23	136±28.4	100±0.0
Subject40	40	UVDi	light-dark	Lateral	Light	0.40±0.078	2	2.9±1.60	233±28.2	100±0.0
Subject40	40	UVDi	light-dark	Lateral	Dark	0.37±0.062	1	3.5±2.56	188±82.3	100±0.0
Subject40	40	UVDi	light-dark	Lateral	Dark	0.37±0.062	2	2.4±1.48	383±101.2	83±0.0
Subject40	40	UVDi	light-dark	Anterior	Light	0.60±0.083	1	1.4±0.75	275±91.3	76±0.0
Subject40	40	UVDi	light-dark	Anterior	Light	0.60±0.083	2	0.6±0.09	382±11.3	8±0.0
Subject40	40	UVDi	light-dark	Anterior	Dark	0.67±0.066	1	1.1±0.42	321±75.8	32±0.0
Subject40	40	UVDi	light-dark	Anterior	Dark	0.67±0.066	2	0.4±0.07	519±4.8	8±0.0
Subject40	40	UVDi	light-dark	Posterior	Light	0.13±0.068	1	4.2±1.78	182±49.4	100±0.0
Subject40	40	UVDi	light-dark	Posterior	Light	0.13±0.068	2	2.3±1.17	298±61.7	93±0.0
Subject40	40	UVDi	light-dark	Posterior	Dark	0.17±0.060	1	1.3±0.64	308±43.4	70±0.0
Subject40	40	UVDi	light-dark	Posterior	Dark	0.17±0.060	2	0.8±0.52	456±74.1	12±0.0
Subject15	70	BVD	light-dark	Lateral	Light	-0.03±0.026	1	7.3±2.62	165±17.0	100±0.0
Subject15	70	BVD	light-dark	Lateral	Light	-0.03±0.026	2	2.3±1.17	362±70.7	96±5.0
Subject15	70	BVD	light-dark	Lateral	Dark	-0.01±0.024	1	3.1±0.94	168±70.2	90±7.2
Subject15	70	BVD	light-dark	Lateral	Dark	-0.01±0.024	2	1.7±0.63	472±68.9	28±0.0
Subject15	70	BVD	light-dark	Anterior	Light	-0.00±0.082	1	6.6±2.35	190±67.4	98±1.8
Subject15	70	BVD	light-dark	Anterior	Light	-0.00±0.082	2	1.5±0.97	424±79.2	64±21.9
Subject15	70	BVD	light-dark	Anterior	Dark	-0.01±0.073	1	1.1±0.89	236±102.3	42±1.3
Subject15	70	BVD	light-dark	Anterior	Dark	-0.01±0.073	2	0.6±NaN	547±NaN	4±NaN
Subject15	70	BVD	light-dark	Posterior	Light	-0.01±0.029	1	6.7±2.06	205±79.6	100±0.0
Subject15	70	BVD	light-dark	Posterior	Light	-0.01±0.029	2	0.6±0.24	414±76.6	65±38.9
Subject15	70	BVD	light-dark	Posterior	Dark	-0.01±0.031	1	1.2±0.70	281±118.6	80±25.1
Subject15	70	BVD	light-dark	Posterior	Dark	-0.01±0.031	2	0.7±0.33	477±112.7	18±6.6
Subject16	40	BVL	light-dark	Lateral	Light	0.31±0.084	1	7.8±3.02	89±13.6	98±1.7
Subject16	40	BVL	light-dark	Lateral	Light	0.31±0.084	2	3.1±2.21	301±64.5	91±3.1
Subject16	40	BVL	light-dark	Lateral	Dark	0.28±0.075	1	5.0±2.04	131±75.0	87±6.3
Subject16	40	BVL	light-dark	Anterior	Light	0.44±0.095	1	2.8±1.73	164±96.2	97±0.0
Subject16	40	BVL	light-dark	Anterior	Light	0.44±0.095	2	0.8±0.60	427±26.1	63±10.9
Subject16	40	BVL	light-dark	Anterior	Dark	0.27±0.069	1	2.2±1.26	125±35.6	27±0.9
Subject16	40	BVL	light-dark	Posterior	Light	0.12±0.082	1	7.0±2.46	108±34.8	100±0.0
Subject16	40	BVL	light-dark	Posterior	Light	0.12±0.082	2	1.6±0.83	335±46.3	67±0.6
Subject16	40	BVL	light-dark	Posterior	Dark	0.13±0.058	1	2.7±1.45	223±145.9	39±13.2
Subject14	40	Normal	light-dark	Lateral	Light	0.95±0.045	1	0.6±0.36	335±86.0	79±1.3
Subject14	40	Normal	light-dark	Lateral	Light	0.95±0.045	2	0.4±0.35	397±115.6	28±4.5
Subject14	40	Normal	light-dark	Lateral	Dark	0.97±0.071	1	1.1±0.94	385±83.9	68±3.1
Subject14	40	Normal	light-dark	Lateral	Dark	0.97±0.071	2	1.5±1.39	453±88.9	31±0.5
Subject07	40	UVDc	light-dark	Lateral	Light	0.98±0.046	1	0.8±0.37	303±84.5	79±0.0
Subject07	40	UVDc	light-dark	Lateral	Light	0.98±0.046	2	0.7±0.59	410±100.3	65±0.0
Subject07	40	UVDc	light-dark	Lateral	Dark	1.01±0.087	1	1.4±NaN	383±NaN	64±NaN
Subject07	40	UVDc	light-dark	Lateral	Dark	1.01±0.087	2	1.9±0.89	250±106.1	27±0.0
Subject07	40	UVDc	light-dark	Anterior	Light	0.78±0.070	1	0.9±NaN	514±NaN	3±NaN
Subject07	40	UVDc	light-dark	Posterior	Light	0.82±0.047	1	0.9±0.39	408±119.4	19±0.0
Subject07	40	UVDi	light-dark	Lateral	Light	0.35±0.092	1	7.2±3.64	102±13.3	100±0.0
Subject07	40	UVDi	light-dark	Lateral	Light	0.35±0.092	2	2.0±1.11	218±75.0	100±0.0
Subject07	40	UVDi	light-dark	Lateral	Dark	0.31±0.069	1	7.4±2.37	160±87.9	100±0.0
Subject07	40	UVDi	light-dark	Lateral	Dark	0.31±0.069	2	1.6±0.99	369±125.5	66±0.0
Subject07	40	UVDi	light-dark	Anterior	Light	0.66±0.107	1	1.0±0.40	331±54.4	55±0.0
Subject07	40	UVDi	light-dark	Anterior	Light	0.66±0.107	2	0.9±0.56	431±74.5	14±0.0
Subject07	40	UVDi	light-dark	Posterior	Light	0.26±0.078	1	2.9±NaN	162±NaN	3±NaN
Subject41	30	Normal	dark-light	Lateral	Light	0.91±0.052	1	0.7±0.36	242±81.8	65±1.4
Subject41	30	Normal	dark-light	Lateral	Light	0.91±0.052	2	0.1±0.13	471±2.9	24±1.6
Subject41	30	Normal	dark-light	Lateral	Dark	0.88±0.057	1	1.3±0.50	366±141.0	31±0.0
Subject24	40	Normal	dark-light	Lateral	Light	0.90±0.035	1	0.6±0.42	295±88.5	80±1.6
Subject24	40	Normal	dark-light	Lateral	Light	0.90±0.035	2	0.3±0.13	464±30.2	17±6.7
Subject24	40	Normal	dark-light	Lateral	Dark	0.89±0.036	1	2.0±0.95	397±119.6	17±0.0
Subject24	40	Normal	dark-light	Lateral	Dark	0.89±0.036	2	1.0±NaN	375±NaN	6±NaN
Subject19	40	BVL	dark-light	Lateral	Light	0.00±0.016	1	4.7±1.15	133±10.3	91±2.4
Subject19	40	BVL	dark-light	Lateral	Light	0.00±0.016	2	5.6±2.55	291±53.3	100±0.0
Subject19	40	BVL	dark-light	Lateral	Dark	0.03±0.021	1	2.1±0.87	361±124.3	86±2.4
Subject19	40	BVL	dark-light	Lateral	Dark	0.03±0.021	2	2.1±0.53	506±40.6	14±0.7
Subject19	40	BVL	dark-light	Anterior	Light	0.12±0.065	1	7.3±2.42	162±17.8	100±0.0
Subject19	40	BVL	dark-light	Anterior	Light	0.12±0.065	2	2.4±1.53	347±46.1	85±5.7
Subject19	40	BVL	dark-light	Anterior	Dark	0.10±0.077	1	1.4±1.55	348±120.9	74±5.0
Subject19	40	BVL	dark-light	Anterior	Dark	0.10±0.077	2	1.9±2.90	433±140.6	12±1.0
Subject19	40	BVL	dark-light	Posterior	Light	0.14±0.052	1	6.8±2.14	180±29.4	93±4.5
Subject19	40	BVL	dark-light	Posterior	Light	0.14±0.052	2	2.8±1.69	361±85.6	91±0.1
Subject19	40	BVL	dark-light	Posterior	Dark	0.15±0.051	1	1.8±1.14	315±131.6	57±6.2
Subject19	40	BVL	dark-light	Posterior	Dark	0.15±0.051	2	1.0±0.40	492±18.9	10±0.0
Subject34	40	Normal	dark-light	Lateral	Light	0.90±0.045	1	0.5±0.21	367±100.9	48±3.6
Subject34	40	Normal	dark-light	Lateral	Dark	0.90±0.058	1	0.6±NaN	212±NaN	4±NaN
Subject06	40	UVDc	light-dark	Lateral	Light	0.78±0.058	1	2.5±1.41	183±81.7	100±0.0
Subject06	40	UVDc	light-dark	Lateral	Light	0.78±0.058	2	0.6±0.39	381±31.2	58±0.0
Subject06	40	UVDc	light-dark	Lateral	Dark	0.72±0.052	1	0.7±0.02	401±25.1	31±0.0
Subject06	40	UVDc	light-dark	Lateral	Dark	0.72±0.052	2	0.7±NaN	475±NaN	8±NaN
Subject06	40	UVDc	light-dark	Anterior	Light	0.97±0.107	1	0.4±0.11	301±77.1	70±0.0
Subject06	40	UVDc	light-dark	Anterior	Dark	0.74±0.112	NA	NA	NA	NA
Subject06	40	UVDc	light-dark	Posterior	Light	0.49±0.085	1	3.6±1.77	164±54.5	91±0.0
Subject06	40	UVDc	light-dark	Posterior	Light	0.49±0.085	2	1.0±NaN	316±NaN	74±NaN
Subject06	40	UVDc	light-dark	Posterior	Dark	0.42±0.068	1	1.7±0.84	231±118.9	12±0.0
Subject06	40	UVDi	light-dark	Lateral	Light	0.21±0.060	1	9.3±3.48	113±12.4	100±0.0
Subject06	40	UVDi	light-dark	Lateral	Light	0.21±0.060	2	2.6±1.15	208±42.2	96±0.0
Subject06	40	UVDi	light-dark	Lateral	Dark	0.26±0.082	1	4.7±2.99	175±107.4	92±0.0
Subject06	40	UVDi	light-dark	Lateral	Dark	0.26±0.082	2	2.1±1.07	347±70.2	48±0.0
Subject06	40	UVDi	light-dark	Anterior	Light	0.33±0.077	1	2.7±1.10	123±45.6	100±0.0
Subject06	40	UVDi	light-dark	Anterior	Light	0.33±0.077	2	1.9±0.77	218±39.1	89±0.0
Subject06	40	UVDi	light-dark	Anterior	Dark	0.32±0.091	1	1.7±0.32	290±51.4	17±0.0
Subject06	40	UVDi	light-dark	Anterior	Dark	0.32±0.091	2	1.3±0.01	445±21.4	7±0.0
Subject06	40	UVDi	light-dark	Posterior	Light	0.22±0.044	1	4.1±1.72	151±19.7	100±0.0
Subject06	40	UVDi	light-dark	Posterior	Light	0.22±0.044	2	1.6±0.99	337±54.9	84±0.0
Subject06	40	UVDi	light-dark	Posterior	Dark	0.22±0.051	1	2.0±0.86	243±105.7	37±0.0
Subject06	40	UVDi	light-dark	Posterior	Dark	0.22±0.051	2	1.2±0.55	413±105.4	11±0.0
Subject30	70	UVDc	light-dark	Lateral	Light	0.89±0.032	1	0.8±0.29	442±48.2	86±0.0
Subject30	70	UVDc	light-dark	Lateral	Light	0.89±0.032	2	1.6±1.14	469±74.1	29±0.0
Subject30	70	UVDc	light-dark	Lateral	Dark	0.83±0.103	1	1.9±0.58	410±72.8	56±0.0
Subject30	70	UVDc	light-dark	Lateral	Dark	0.83±0.103	2	1.6±0.23	484±53.1	15±0.0
Subject30	70	UVDc	light-dark	Anterior	Light	0.98±0.090	1	1.4±0.66	425±65.7	72±0.0
Subject30	70	UVDc	light-dark	Anterior	Light	0.98±0.090	2	0.8±0.17	538±58.4	14±0.0
Subject30	70	UVDc	light-dark	Anterior	Dark	0.83±0.154	1	1.6±1.36	433±19.3	9±0.0
Subject30	70	UVDc	light-dark	Posterior	Light	0.72±0.044	1	1.1±0.93	313±123.8	76±0.0
Subject30	70	UVDc	light-dark	Posterior	Light	0.72±0.044	2	0.3±0.11	533±39.4	24±0.0
Subject30	70	UVDc	light-dark	Posterior	Dark	0.65±0.083	1	4.4±NaN	128±NaN	9±NaN
Subject30	70	UVDi	light-dark	Lateral	Light	0.27±0.052	1	5.2±2.02	231±118.1	100±0.0
Subject30	70	UVDi	light-dark	Lateral	Light	0.27±0.052	2	3.1±1.86	399±67.3	60±0.0
Subject30	70	UVDi	light-dark	Lateral	Dark	0.32±0.114	1	5.4±3.49	166±117.9	87±0.0
Subject30	70	UVDi	light-dark	Lateral	Dark	0.32±0.114	2	2.6±1.15	435±88.8	58±0.0
Subject30	70	UVDi	light-dark	Anterior	Light	0.51±0.058	1	2.0±1.08	288±71.7	100±0.0
Subject30	70	UVDi	light-dark	Anterior	Light	0.51±0.058	2	1.5±0.74	459±65.0	56±0.0
Subject30	70	UVDi	light-dark	Anterior	Dark	0.47±0.097	1	1.2±0.66	434±81.1	26±0.0
Subject30	70	UVDi	light-dark	Anterior	Dark	0.47±0.097	2	1.1±NaN	537±NaN	4±NaN
Subject30	70	UVDi	light-dark	Posterior	Light	0.33±0.067	1	5.6±2.27	203±59.3	100±0.0
Subject30	70	UVDi	light-dark	Posterior	Light	0.33±0.067	2	1.3±0.70	477±55.1	74±0.0
Subject30	70	UVDi	light-dark	Posterior	Dark	0.23±0.079	1	3.9±3.84	365±115.8	47±0.0
Subject30	70	UVDi	light-dark	Posterior	Dark	0.23±0.079	2	3.8±NaN	378±NaN	3±NaN
Subject10	60	Normal	dark-light	Lateral	Light	0.97±0.050	1	1.0±0.58	255±45.5	87±2.9
Subject10	60	Normal	dark-light	Lateral	Light	0.97±0.050	2	0.4±0.14	425±59.3	37±9.9
Subject10	60	Normal	dark-light	Lateral	Dark	1.01±0.046	1	0.8±0.32	341±121.8	59±11.5
Subject10	60	Normal	dark-light	Anterior	Light	0.87±0.090	1	0.9±0.72	249±77.4	90±13.2
Subject10	60	Normal	dark-light	Anterior	Light	0.87±0.090	2	0.8±0.41	410±33.3	36±0.0
Subject10	60	Normal	dark-light	Anterior	Dark	0.82±0.124	NA	NA	NA	NA
Subject10	60	Normal	dark-light	Posterior	Light	0.78±0.081	1	1.7±0.99	232±112.7	92±10.4
Subject10	60	Normal	dark-light	Posterior	Light	0.78±0.081	2	0.6±0.55	402±69.1	54±12.3
Subject10	60	Normal	dark-light	Posterior	Dark	0.61±0.067	1	2.8±1.77	238±118.9	74±7.2
Subject10	60	Normal	dark-light	Posterior	Dark	0.61±0.067	2	1.4±1.24	401±91.3	24±8.4
Subject43	60	UVDc	light-dark	Lateral	Light	0.75±0.051	1	0.3±NaN	400±NaN	84±NaN
Subject43	60	UVDc	light-dark	Lateral	Light	0.75±0.051	2	0.6±NaN	370±NaN	16±NaN
Subject43	60	UVDc	light-dark	Lateral	Dark	0.86±0.081	NA	NA	NA	NA
Subject43	60	UVDc	light-dark	Anterior	Light	0.64±0.075	1	1.0±0.84	288±138.8	73±0.0
Subject43	60	UVDc	light-dark	Anterior	Dark	0.63±0.044	NA	NA	NA	NA
Subject43	60	UVDc	light-dark	Posterior	Light	0.73±0.068	1	1.7±1.41	307±153.0	61±0.0
Subject43	60	UVDc	light-dark	Posterior	Dark	0.65±0.072	1	2.9±2.64	325±205.1	29±0.0
Subject43	60	UVDi	light-dark	Lateral	Light	0.35±0.037	1	3.6±2.23	195±54.7	100±0.0
Subject43	60	UVDi	light-dark	Lateral	Light	0.35±0.037	2	3.7±1.85	298±47.8	82±0.0
Subject43	60	UVDi	light-dark	Lateral	Dark	0.32±0.071	1	6.3±3.41	183±123.9	96±0.0
Subject43	60	UVDi	light-dark	Lateral	Dark	0.32±0.071	2	4.9±3.16	366±100.1	62±0.0
Subject43	60	UVDi	light-dark	Anterior	Light	0.44±0.079	1	1.3±0.71	211±59.5	96±0.0
Subject43	60	UVDi	light-dark	Anterior	Light	0.44±0.079	2	1.3±0.62	338±56.9	82±0.0
Subject43	60	UVDi	light-dark	Anterior	Dark	0.41±0.072	1	2.5±0.41	355±47.8	71±0.0
Subject43	60	UVDi	light-dark	Anterior	Dark	0.41±0.072	2	2.0±0.23	400±68.8	24±0.0
Subject43	60	UVDi	light-dark	Posterior	Light	0.48±0.040	1	1.9±0.80	192±67.6	100±0.0
Subject43	60	UVDi	light-dark	Posterior	Light	0.48±0.040	2	1.1±0.45	408±56.8	54±0.0
Subject43	60	UVDi	light-dark	Posterior	Dark	0.30±0.053	1	2.8±1.26	194±107.6	90±0.0
Subject43	60	UVDi	light-dark	Posterior	Dark	0.30±0.053	2	1.6±0.91	307±107.2	33±0.0
Subject29	20	UVDc	light-dark	Lateral	Light	0.85±0.064	1	0.4±0.29	355±108.8	96±0.0
Subject29	20	UVDc	light-dark	Lateral	Light	0.85±0.064	2	0.2±0.30	494±118.3	12±0.0
Subject29	20	UVDc	light-dark	Lateral	Dark	0.99±0.048	2	1.4±1.02	338±78.8	23±0.0
Subject29	20	UVDc	light-dark	Anterior	Light	0.86±0.067	1	0.5±0.22	395±22.8	65±0.0
Subject29	20	UVDc	light-dark	Anterior	Light	0.86±0.067	2	0.6±0.07	444±113.0	24±0.0
Subject29	20	UVDc	light-dark	Anterior	Dark	0.85±0.095	2	1.2±0.72	380±92.2	27±0.0
Subject29	20	UVDc	light-dark	Posterior	Light	0.89±0.075	1	0.4±0.26	353±99.9	92±0.0
Subject29	20	UVDc	light-dark	Posterior	Light	0.89±0.075	2	0.3±0.32	373±80.4	58±0.0
Subject29	20	UVDc	light-dark	Posterior	Dark	0.92±0.062	1	1.0±NaN	430±NaN	65±NaN
Subject29	20	UVDc	light-dark	Posterior	Dark	0.92±0.062	2	1.3±0.51	391±35.0	35±0.0
Subject29	20	UVDi	light-dark	Lateral	Light	0.41±0.052	1	6.2±1.46	141±14.5	100±0.0
Subject29	20	UVDi	light-dark	Lateral	Light	0.41±0.052	2	3.3±1.66	290±44.7	95±0.0
Subject29	20	UVDi	light-dark	Lateral	Dark	0.40±0.078	1	7.1±2.84	157±53.0	94±0.0
Subject29	20	UVDi	light-dark	Lateral	Dark	0.40±0.078	2	3.5±1.46	353±119.7	62±0.0
Subject29	20	UVDi	light-dark	Anterior	Light	0.60±0.089	1	2.2±0.65	157±45.8	100±0.0
Subject29	20	UVDi	light-dark	Anterior	Light	0.60±0.089	2	1.3±0.61	287±58.7	92±0.0
Subject29	20	UVDi	light-dark	Anterior	Dark	0.59±0.084	1	1.7±0.92	338±149.4	19±0.0
Subject29	20	UVDi	light-dark	Anterior	Dark	0.59±0.084	2	1.7±0.95	529±20.8	8±0.0
Subject29	20	UVDi	light-dark	Posterior	Light	0.27±0.067	1	5.7±1.24	191±45.1	100±0.0
Subject29	20	UVDi	light-dark	Posterior	Light	0.27±0.067	2	2.1±1.24	416±62.1	80±0.0
Subject29	20	UVDi	light-dark	Posterior	Dark	0.22±0.067	1	4.2±2.00	186±67.9	97±0.0
Subject29	20	UVDi	light-dark	Posterior	Dark	0.22±0.067	2	1.9±1.03	384±107.1	50±0.0
Subject18	30	Normal	light-dark	Lateral	Light	0.87±0.040	1	0.9±0.39	253±111.9	49±9.6
Subject18	30	Normal	light-dark	Lateral	Light	0.87±0.040	2	0.6±0.57	333±103.6	5±2.6
Subject18	30	Normal	light-dark	Lateral	Dark	0.84±0.038	1	0.3±0.03	399±103.1	8±4.2
Subject18	30	Normal	light-dark	Lateral	Dark	0.84±0.038	2	1.5±NaN	334±NaN	5±NaN
Subject37	40	UVDc	dark-light	Lateral	Light	0.83±0.034	1	0.7±0.34	293±100.1	92±0.0
Subject37	40	UVDc	dark-light	Lateral	Light	0.83±0.034	2	0.1±0.03	371±163.5	37±0.0
Subject37	40	UVDc	dark-light	Lateral	Dark	0.79±0.039	1	2.0±0.29	488±60.9	8±0.0
Subject37	40	UVDc	dark-light	Anterior	Light	0.85±0.085	1	0.9±NaN	128±NaN	80±NaN
Subject37	40	UVDc	dark-light	Anterior	Light	0.85±0.085	2	0.5±0.12	494±1.8	10±0.0
Subject37	40	UVDc	dark-light	Anterior	Dark	0.71±0.082	NA	NA	NA	NA
Subject37	40	UVDc	dark-light	Posterior	Light	0.77±0.050	1	1.3±0.48	467±63.9	38±0.0
Subject37	40	UVDc	dark-light	Posterior	Dark	0.65±0.096	NA	NA	NA	NA
Subject37	40	UVDi	dark-light	Lateral	Light	0.44±0.047	1	6.1±2.50	258±72.4	100±0.0
Subject37	40	UVDi	dark-light	Lateral	Light	0.44±0.047	2	2.0±1.90	462±88.4	54±0.0
Subject37	40	UVDi	dark-light	Lateral	Dark	0.58±0.105	1	3.2±0.88	204±163.5	35±0.0
Subject37	40	UVDi	dark-light	Lateral	Dark	0.58±0.105	2	2.6±1.83	302±254.2	6±0.0
Subject37	40	UVDi	dark-light	Anterior	Light	0.46±0.072	1	2.9±1.69	329±93.1	88±0.0
Subject37	40	UVDi	dark-light	Anterior	Light	0.46±0.072	2	2.0±0.48	468±57.0	19±0.0
Subject37	40	UVDi	dark-light	Anterior	Dark	0.40±0.059	NA	NA	NA	NA
Subject37	40	UVDi	dark-light	Posterior	Light	0.20±0.045	1	3.4±1.41	182±27.8	100±0.0
Subject37	40	UVDi	dark-light	Posterior	Light	0.20±0.045	2	3.6±1.75	454±64.4	100±0.0
Subject37	40	UVDi	dark-light	Posterior	Dark	0.16±0.062	1	2.7±1.18	292±127.6	52±0.0
Subject37	40	UVDi	dark-light	Posterior	Dark	0.16±0.062	2	1.5±0.38	491±32.2	9±0.0
